# Supplementary material
Source: MDPI journal article supplement (https://www.mdpi.com/2075-163X/12/5/652)
Supplement: s1 [file s1]

**Supplementary Table S3.** LA-ICP-MS Lu-Hf analysis results of the rhyolite and the granite porphyry zircons.

| Sample No. | Age (Ma) | $^{176}\text{Yb}/^{177}\text{Hf}$ | $^{176}\text{Lu}/^{177}\text{Hf}$ | $^{176}\text{Hf}/^{177}\text{Hf}$ | $\varepsilon\text{Hf}(0)$ | $\varepsilon\text{Hf}(t)$ | $T_{\text{DM}}$ (Ma) | $T_{\text{DM}}^{\text{C}}$ (Ma) | $f_{\text{Lu}/\text{Hf}}$ |
|------------|----------|-----------------------------------|-----------------------------------|-----------------------------------|---------------------------|---------------------------|----------------------|---------------------------------|---------------------------|
| MJ26-1     | 261      | 0.022332                          | 0.00089                           | 0.282478                          | -10.40                    | -4.83                     | 1092                 | 2145                            | -0.97                     |
| MJ26-2     | 246      | 0.00596                           | 0.000208                          | 0.282458                          | -11.11                    | -5.75                     | 1101                 | 2219                            | -0.99                     |
| MJ26-3     | 235      | 0.004561                          | 0.000149                          | 0.282478                          | -10.39                    | -5.26                     | 1071                 | 2168                            | -1.00                     |
| MJ26-4     | 259      | 0.021587                          | 0.000883                          | 0.282505                          | -9.43                     | -3.90                     | 1054                 | 2061                            | -0.97                     |
| MJ26-5     | 256      | 0.016058                          | 0.000604                          | 0.282472                          | -10.59                    | -4.88                     | 1092                 | 2153                            | -0.98                     |
| MJ26-6     | 263      | 0.017324                          | 0.000716                          | 0.282526                          | -8.72                     | -3.07                     | 1021                 | 1989                            | -0.98                     |
| MJ26-7     | 249      | 0.030908                          | 0.001125                          | 0.282419                          | -12.49                    | -7.22                     | 1183                 | 2352                            | -0.97                     |
| MJ26-8     | 248      | 0.016825                          | 0.000701                          | 0.282532                          | -8.48                     | -3.15                     | 1011                 | 1986                            | -0.98                     |
| MJ26-9     | 249      | 0.027518                          | 0.001064                          | 0.282598                          | -6.14                     | -1.02                     | 928                  | 1791                            | -0.97                     |
| MJ26-10    | 257      | 0.013834                          | 0.000575                          | 0.282466                          | -10.82                    | -5.28                     | 1100                 | 2183                            | -0.98                     |
| MJ26-11    | 252      | 0.018539                          | 0.000734                          | 0.282599                          | -6.13                     | -0.72                     | 919                  | 1771                            | -0.98                     |
| LWZ-02-1   | 254      | 0.038313                          | 0.001543                          | 0.282678                          | -3.32                     | 2.00                      | 826                  | 1527                            | -0.95                     |
| LWZ-02-2   | 253      | 0.040472                          | 0.001647                          | 0.282617                          | -5.49                     | -0.21                     | 916                  | 1725                            | -0.95                     |
| LWZ-02-3   | 256      | 0.047117                          | 0.001908                          | 0.282703                          | -2.43                     | 2.87                      | 797                  | 1449                            | -0.94                     |
| LWZ-02-4   | 249      | 0.041405                          | 0.001736                          | 0.282741                          | -1.10                     | 4.08                      | 739                  | 1336                            | -0.95                     |
| LWZ-02-5   | 258      | 0.041614                          | 0.001733                          | 0.282615                          | -5.54                     | -0.18                     | 920                  | 1725                            | -0.95                     |
| LWZ-02-6   | 250      | 0.047888                          | 0.001998                          | 0.282648                          | -4.37                     | 0.79                      | 879                  | 1633                            | -0.94                     |
| LWZ-02-7   | 253      | 0.065853                          | 0.002685                          | 0.282661                          | -3.92                     | 1.19                      | 877                  | 1599                            | -0.92                     |
| LWZ-02-8   | 256      | 0.038625                          | 0.001449                          | 0.282593                          | -6.34                     | -0.97                     | 945                  | 1795                            | -0.96                     |
| LWZ-02-9   | 254      | 0.046565                          | 0.001749                          | 0.282635                          | -4.84                     | 0.44                      | 892                  | 1667                            | -0.95                     |
| LWZ-02-10  | 257      | 0.04751                           | 0.001706                          | 0.282676                          | -3.41                     | 1.95                      | 833                  | 1534                            | -0.95                     |
| LWZ-02-11  | 250      | 0.036415                          | 0.001381                          | 0.282673                          | -3.49                     | 1.77                      | 829                  | 1544                            | -0.96                     |
| LWZ-02-12  | 255      | 0.04806                           | 0.001806                          | 0.282645                          | -4.48                     | 0.82                      | 879                  | 1634                            | -0.95                     |

$$\varepsilon\text{Hf}(t)=10000\times\left\{\left[\left(\frac{{}^{176}\text{Hf}}{{}^{177}\text{Hf}}\right)_{\text{S}}-\left(\frac{{}^{176}\text{Lu}}{{}^{177}\text{Hf}}\right)_{\text{S}}\times\left(e^{\lambda t}-1\right)\right]/\left[\left(\frac{{}^{176}\text{Hf}}{{}^{177}\text{Hf}}\right)_{\text{CHUR},0}-\left(\frac{{}^{176}\text{Lu}}{{}^{177}\text{Hf}}\right)_{\text{CHUR}}\times\left(e^{\lambda t}-1\right)\right]-1\right\}$$

$$T_{\text{DM}}=1/\lambda\times\ln\left\{1+\left[\left(\frac{{}^{176}\text{Hf}}{{}^{177}\text{Hf}}\right)_{\text{S}}-\left(\frac{{}^{176}\text{Hf}}{{}^{177}\text{Hf}}\right)_{\text{DM}}\right]/\left[\left(\frac{{}^{176}\text{Hf}}{{}^{177}\text{Hf}}\right)_{\text{S}}-\left(\frac{{}^{176}\text{Hf}}{{}^{177}\text{Hf}}\right)_{\text{DM}}\right]\right\}$$

$$T_{\text{DM}}^{\text{C}}=T_{\text{DM}}-(T_{\text{DM}}-t)\times\left[\left(\text{fcc}-\text{fs}\right)/\left(\text{fcc}-\text{f}_{\text{DM}}\right)\right] \quad f_{\text{Lu}/\text{Hf}}=\left(\frac{{}^{176}\text{Lu}}{{}^{177}\text{Hf}}\right)_{\text{S}}/\left(\frac{{}^{176}\text{Lu}}{{}^{177}\text{Hf}}\right)_{\text{CHUR}}-1$$

$\lambda=1.867\times10^{-11}/\text{a}$  [86];  $(^{176}\text{Lu}/^{177}\text{Hf})_{\text{S}}$  and  $(^{176}\text{Hf}/^{177}\text{Hf})_{\text{S}}$  are the measured values of samples;  $(^{176}\text{Lu}/^{177}\text{Hf})_{\text{CHUR}}=0.0332$ ,  $(^{176}\text{Hf}/^{177}\text{Hf})_{\text{CHUR},0}=0.282772$  [51, 87];  $(^{176}\text{Lu}/^{177}\text{Hf})_{\text{DM}}=0.0384$ ,  $(^{176}\text{Hf}/^{177}\text{Hf})_{\text{DM}}=0.28325$  [52];  $(^{176}\text{Lu}/^{177}\text{Hf})$  Average crust=0.015;  $\text{fcc}=[(^{176}\text{Lu}/^{177}\text{Hf})_{\text{mean crust}}/(^{176}\text{Lu}/^{177}\text{Hf})_{\text{CHUR}}]-1$ ;  $\text{fs}=f_{\text{Lu}/\text{Hf}}$ ;  $\text{f}_{\text{DM}}=[(^{176}\text{Lu}/^{177}\text{Hf})_{\text{DM}}/(^{176}\text{Lu}/^{177}\text{Hf})_{\text{CHUR}}]-1$ ;  $t$  is the crystallization age of zircon
