# Supplementary material
Source: MDPI journal article supplement (https://www.mdpi.com/2075-163X/12/5/652)
Supplement: s1 [file s1]

**Supplementary Table S2.** LA-ICP-MS zircon U-Pb data of the rhyolite and the granite porphyry.

| Sample No. | Element content (ppm) |         | Th/U | Element ratios                       |         |                                     |         |                                     |         | Age (Ma)                             |    |                                     |    |                                     |    |
|------------|-----------------------|---------|------|--------------------------------------|---------|-------------------------------------|---------|-------------------------------------|---------|--------------------------------------|----|-------------------------------------|----|-------------------------------------|----|
|            | Th                    | U       |      | <sup>207</sup> Pb/ <sup>206</sup> Pb | 1σ      | <sup>207</sup> Pb/ <sup>235</sup> U | 1σ      | <sup>206</sup> Pb/ <sup>238</sup> U | 1σ      | <sup>207</sup> Pb/ <sup>206</sup> Pb | 1σ | <sup>207</sup> Pb/ <sup>235</sup> U | 1σ | <sup>206</sup> Pb/ <sup>238</sup> U | 1σ |
| MJ26-01    | 206.98                | 865.57  | 0.24 | 0.05188                              | 0.00108 | 0.29587                             | 0.00588 | 0.04136                             | 0.00044 | 280                                  | 47 | 263                                 | 5  | 261.0                               | 3  |
| MJ26-02    | 202.36                | 822.76  | 0.25 | 0.05183                              | 0.00112 | 0.27831                             | 0.00573 | 0.03894                             | 0.00042 | 278                                  | 49 | 249                                 | 5  | 246.0                               | 3  |
| MJ26-03    | 348.99                | 1537.97 | 0.23 | 0.05301                              | 0.00145 | 0.46587                             | 0.00789 | 0.04199                             | 0.00043 | 329                                  | 35 | 263                                 | 5  | 256.0                               | 3  |
| MJ26-04    | 957.94                | 1837.37 | 0.52 | 0.05163                              | 0.0015  | 0.41393                             | 0.00792 | 0.0406                              | 0.00044 | 269                                  | 40 | 251                                 | 6  | 249.0                               | 3  |
| MJ26-05    | 439.46                | 1006.2  | 0.44 | 0.05179                              | 0.0011  | 0.26538                             | 0.00534 | 0.03715                             | 0.0004  | 276.3                                | 48 | 239                                 | 4  | 235.2                               | 2  |
| MJ26-06    | 136.79                | 388.27  | 0.35 | 0.05931                              | 0.00147 | 0.37308                             | 0.00885 | 0.04561                             | 0.00052 | 578.6                                | 53 | 321.9                               | 7  | 287.5                               | 2  |
| MJ26-07    | 517.78                | 2194.74 | 0.24 | 0.05751                              | 0.00107 | 0.32504                             | 0.00569 | 0.04098                             | 0.00042 | 511                                  | 21 | 286                                 | 4  | 259.0                               | 3  |
| MJ26-08    | 227.29                | 1227.76 | 0.19 | 0.05247                              | 0.00104 | 0.30728                             | 0.00578 | 0.04247                             | 0.00045 | 305.9                                | 45 | 272.1                               | 4  | 268.1                               | 3  |
| MJ26-11    | 211.01                | 776.87  | 0.27 | 0.04933                              | 0.00108 | 0.30581                             | 0.00636 | 0.04495                             | 0.00048 | 163.3                                | 50 | 270.9                               | 5  | 283.5                               | 3  |
| MJ26-12    | 124.23                | 585.72  | 0.21 | 0.05139                              | 0.00121 | 0.2957                              | 0.00663 | 0.04172                             | 0.00046 | 258                                  | 31 | 263                                 | 5  | 263.0                               | 3  |
| MJ26-14    | 429.78                | 3188.31 | 0.13 | 0.05238                              | 0.00103 | 0.30394                             | 0.00529 | 0.03959                             | 0.00041 | 302                                  | 57 | 254                                 | 5  | 249.0                               | 2  |
| MJ26-15    | 136.9                 | 1426.61 | 0.10 | 0.05172                              | 0.00103 | 0.27972                             | 0.00528 | 0.03922                             | 0.00041 | 273                                  | 25 | 250                                 | 4  | 248.0                               | 3  |
| MJ26-18    | 185.65                | 1867.99 | 0.10 | 0.0515                               | 0.001   | 0.28885                             | 0.00529 | 0.04067                             | 0.00042 | 263                                  | 24 | 258                                 | 4  | 257.0                               | 3  |
| MJ26-19    | 226.39                | 269.76  | 0.84 | 0.0575                               | 0.00144 | 0.61283                             | 0.01461 | 0.07728                             | 0.00089 | 510.3                                | 54 | 485.3                               | 9  | 479.9                               | 5  |
| MJ26-20    | 233.05                | 948.25  | 0.25 | 0.05084                              | 0.00111 | 0.27941                             | 0.00577 | 0.03985                             | 0.00043 | 234                                  | 28 | 250                                 | 5  | 252.0                               | 3  |
| LWZ02-01   | 106.3                 | 277.2   | 0.38 | 0.05209                              | 0.00157 | 0.28853                             | 0.00844 | 0.04018                             | 0.00047 | 289.3                                | 67 | 257.4                               | 7  | 253.9                               | 3  |
| LWZ02-02   | 266.6                 | 741.6   | 0.36 | 0.05222                              | 0.00103 | 0.28088                             | 0.0053  | 0.03901                             | 0.0004  | 295.1                                | 44 | 251.4                               | 4  | 246.7                               | 3  |
| LWZ02-03   | 157.9                 | 329.1   | 0.48 | 0.05035                              | 0.0014  | 0.27743                             | 0.00743 | 0.03997                             | 0.00045 | 211                                  | 63 | 248.6                               | 6  | 252.6                               | 3  |
| LWZ02-04   | 174.6                 | 349.9   | 0.50 | 0.0504                               | 0.00134 | 0.28184                             | 0.00726 | 0.04056                             | 0.00046 | 213.5                                | 61 | 252.1                               | 6  | 256.3                               | 3  |
| LWZ02-05   | 233.0                 | 445.1   | 0.52 | 0.05097                              | 0.00154 | 0.27219                             | 0.00802 | 0.03873                             | 0.00043 | 967.9                                | 43 | 335.2                               | 6  | 251.3                               | 3  |
| LWZ02-06   | 277.5                 | 582.2   | 0.48 | 0.0508                               | 0.0011  | 0.27591                             | 0.00575 | 0.0394                              | 0.00042 | 231.6                                | 49 | 247.4                               | 5  | 249.1                               | 3  |
| LWZ02-07   | 159.0                 | 329.8   | 0.48 | 0.05029                              | 0.0014  | 0.28278                             | 0.00761 | 0.04078                             | 0.00046 | 208.6                                | 63 | 252.9                               | 6  | 257.7                               | 3  |
| LWZ02-08   | 100.6                 | 233.4   | 0.43 | 0.05373                              | 0.00167 | 0.31032                             | 0.00934 | 0.0419                              | 0.0005  | 359.5                                | 69 | 274.4                               | 7  | 264.6                               | 3  |
| LWZ02-09   | 209.6                 | 447.3   | 0.47 | 0.05424                              | 0.00126 | 0.29588                             | 0.00658 | 0.03957                             | 0.00043 | 380.9                                | 51 | 263.2                               | 5  | 250.1                               | 3  |

---

|          |       |       |      |         |         |         |         |         |         |        |    |       |   |       |   |
|----------|-------|-------|------|---------|---------|---------|---------|---------|---------|--------|----|-------|---|-------|---|
| LWZ02-10 | 173.3 | 329.8 | 0.53 | 0.05477 | 0.00147 | 0.30707 | 0.00795 | 0.04067 | 0.00046 | 402.8  | 58 | 271.9 | 6 | 257.0 | 3 |
| LWZ02-11 | 133.6 | 299.0 | 0.45 | 0.05032 | 0.00147 | 0.27462 | 0.00774 | 0.03959 | 0.00046 | 209.7  | 66 | 246.4 | 6 | 250.3 | 3 |
| LWZ02-12 | 168.9 | 344.7 | 0.49 | 0.05363 | 0.0013  | 0.35288 | 0.0082  | 0.04772 | 0.00053 | 355.5  | 54 | 306.9 | 6 | 300.5 | 3 |
| LWZ02-13 | 298.6 | 552.6 | 0.54 | 0.05189 | 0.00115 | 0.28543 | 0.00605 | 0.0399  | 0.00042 | 280.5  | 50 | 255   | 5 | 252.2 | 3 |
| LWZ02-14 | 106.6 | 238.0 | 0.45 | 0.05057 | 0.00169 | 0.287   | 0.00932 | 0.04116 | 0.0005  | 221.3  | 76 | 256.2 | 7 | 260.0 | 3 |
| LWZ02-15 | 210.9 | 350.1 | 0.60 | 0.05315 | 0.00177 | 0.29185 | 0.00955 | 0.03982 | 0.00046 | 1193   | 43 | 380   | 7 | 260.5 | 3 |
| LWZ02-16 | 196.9 | 325.1 | 0.61 | 0.05355 | 0.00148 | 0.29573 | 0.00791 | 0.04005 | 0.00046 | 352.3  | 61 | 263.1 | 6 | 253.2 | 3 |
| LWZ02-17 | 140.5 | 307.6 | 0.46 | 0.05004 | 0.00146 | 0.27986 | 0.00791 | 0.04057 | 0.00047 | 196.7  | 67 | 250.5 | 6 | 256.3 | 3 |
| LWZ02-18 | 190.7 | 389.3 | 0.49 | 0.05255 | 0.00135 | 0.29119 | 0.00717 | 0.04019 | 0.00045 | 309.6  | 57 | 259.5 | 6 | 254.0 | 3 |
| LWZ02-19 | 217.0 | 481.6 | 0.45 | 0.05208 | 0.00122 | 0.29263 | 0.00657 | 0.04075 | 0.00044 | 289    | 53 | 260.6 | 5 | 257.5 | 3 |
| LWZ02-20 | 249.8 | 497.5 | 0.50 | 0.05504 | 0.00183 | 0.30371 | 0.01004 | 0.04002 | 0.00045 | 1593.6 | 34 | 461.1 | 6 | 267.5 | 3 |
| LWZ02-21 | 123.8 | 218.3 | 0.57 | 0.05098 | 0.00185 | 0.2783  | 0.00982 | 0.03959 | 0.00049 | 239.9  | 82 | 249.3 | 8 | 250.3 | 3 |
| LWZ02-22 | 186.0 | 399.8 | 0.47 | 0.05259 | 0.00148 | 0.29376 | 0.008   | 0.04051 | 0.00045 | 722    | 49 | 311.6 | 6 | 259.5 | 3 |
| LWZ02-23 | 165.6 | 364.0 | 0.45 | 0.05207 | 0.00137 | 0.28995 | 0.00733 | 0.04039 | 0.00045 | 288.3  | 59 | 258.5 | 6 | 255.3 | 3 |
| LWZ02-24 | 199.0 | 374.1 | 1.88 | 0.05255 | 0.00137 | 0.28724 | 0.0072  | 0.03964 | 0.00045 | 309.6  | 58 | 256.4 | 6 | 250.6 | 3 |

---
