# Supplementary material
Source: MDPI journal article supplement (https://www.mdpi.com/2075-163X/12/5/652)
Supplement: s1 [file s1]

**Supplementary Table S1.** Major element (wt%), REE element ( $\times 10^{-6}$ ), and trace element ( $\times 10^{-6}$ ) compositions of magmatic rocks.

| Sample No.                     | MJ-22 | MJ-23 | MJ26   | LWZ-02 | LWZ-03 | LWZ-04 | LWZ-05 | LWZ-13 |
|--------------------------------|-------|-------|--------|--------|--------|--------|--------|--------|
| SiO <sub>2</sub>               | 82.62 | 81.16 | 81.31  | 70.79  | 65.30  | 68.87  | 66.22  | 65.50  |
| Al <sub>2</sub> O <sub>3</sub> | 11.20 | 12.39 | 12.60  | 14.63  | 16.24  | 13.42  | 16.40  | 14.72  |
| Fe <sub>2</sub> O <sub>3</sub> | 0.57  | 0.61  | 0.25   | 0.44   | 0.28   | 0.41   | 0.42   | 2.60   |
| FeO                            | 0.13  | 0.06  | 0.16   | 1.61   | 2.71   | 1.87   | 2.27   | 0.31   |
| MnO                            | 0.01  | 0.01  | 0.01   | 0.06   | 0.08   | 0.12   | 0.08   | 0.10   |
| TiO <sub>2</sub>               | 0.01  | 0.01  | 0.01   | 0.22   | 0.32   | 0.23   | 0.34   | 0.26   |
| CaO                            | 0.12  | 0.06  | 0.05   | 2.82   | 3.42   | 3.76   | 3.00   | 4.69   |
| MgO                            | 0.55  | 0.40  | 0.10   | 0.49   | 0.82   | 0.92   | 0.77   | 1.35   |
| Na <sub>2</sub> O              | 0.08  | 0.08  | 0.08   | 0.29   | 0.33   | 0.24   | 0.34   | 0.20   |
| K <sub>2</sub> O               | 2.54  | 2.84  | 3.25   | 3.24   | 3.24   | 3.04   | 3.27   | 3.92   |
| P <sub>2</sub> O <sub>5</sub>  | 0.07  | 0.06  | 0.06   | 0.12   | 0.14   | 0.11   | 0.15   | 0.15   |
| LOI                            | 1.94  | 2.07  | 1.90   | 5.12   | 6.96   | 6.83   | 6.52   | 6.02   |
| Total                          | 99.84 | 99.76 | 99.77  | 99.83  | 99.82  | 99.81  | 99.76  | 99.83  |
| DI                             | 88.8  | 88.4  | 89.9   | 74.7   | 67.5   | 70.2   | 69.8   | 65.6   |
| A/CNK                          | 3.61  | 3.74  | 3.37   | 1.61   | 1.58   | 1.28   | 1.72   | 1.12   |
| La                             | 2.08  | 5.29  | 8.88   | 32.47  | 35.27  | 26.84  | 39.01  | 24.53  |
| Ce                             | 4.64  | 11.99 | 17.71  | 69.95  | 67.07  | 57.28  | 70.76  | 57.07  |
| Pr                             | 0.58  | 1.29  | 1.95   | 6.31   | 7.64   | 5.26   | 7.84   | 5.43   |
| Nd                             | 2.49  | 5.37  | 7.51   | 21.92  | 28.12  | 18.34  | 27.55  | 20.26  |
| Sm                             | 1.08  | 2.10  | 2.36   | 3.93   | 5.19   | 3.47   | 5.23   | 4.10   |
| Eu                             | 0.23  | 0.35  | 0.33   | 0.92   | 1.22   | 0.87   | 1.13   | 1.08   |
| Gd                             | 1.63  | 2.39  | 2.43   | 3.16   | 4.28   | 3.26   | 4.51   | 4.27   |
| Tb                             | 0.36  | 0.46  | 0.44   | 0.49   | 0.73   | 0.59   | 0.77   | 0.81   |
| Dy                             | 2.10  | 2.56  | 2.21   | 2.67   | 4.12   | 3.27   | 4.31   | 4.64   |
| Ho                             | 0.36  | 0.40  | 0.34   | 0.51   | 0.83   | 0.60   | 0.86   | 0.89   |
| Er                             | 0.88  | 0.98  | 0.80   | 1.38   | 2.35   | 1.59   | 2.39   | 2.42   |
| Tm                             | 0.13  | 0.14  | 0.11   | 0.22   | 0.37   | 0.25   | 0.38   | 0.38   |
| Yb                             | 0.78  | 0.82  | 0.64   | 1.49   | 2.41   | 1.63   | 2.43   | 2.53   |
| Lu                             | 0.10  | 0.12  | 0.08   | 0.22   | 0.36   | 0.24   | 0.37   | 0.36   |
| Y                              | 10.59 | 12.76 | 10.82  | 15.09  | 23.58  | 17.93  | 24.53  | 25.44  |
| ΣREE                           | 17.44 | 34.26 | 45.79  | 146    | 160    | 123    | 168    | 129    |
| LREE                           | 11.10 | 26.39 | 38.75  | 136    | 145    | 112    | 152    | 112    |
| HREE                           | 6.35  | 7.87  | 7.05   | 10.1   | 15.4   | 11.4   | 16.0   | 16.3   |
| LREE/HREE                      | 1.75  | 3.35  | 5.50   | 13.4   | 9.36   | 9.80   | 9.47   | 6.90   |
| (La/Yb) <sub>N</sub>           | 1.79  | 4.34  | 9.36   | 14.71  | 9.85   | 11.10  | 10.84  | 6.53   |
| Eu/Eu*                         | 0.52  | 0.48  | 0.42   | 0.77   | 0.77   | 0.78   | 0.70   | 0.78   |
| Ce/Ce*                         | 1.00  | 1.07  | 0.98   | 1.11   | 0.94   | 1.09   | 0.92   | 1.14   |
| Ba                             | 94.70 | 80.50 | 112.60 | 15.32  | 16.68  | 13.89  | 16.04  | 14.24  |
| Ga                             | 12.46 | 14.40 | 15.08  | 375.7  | 464.8  | 362.1  | 426.3  | 482.9  |
| Hf                             | 1.96  | 2.27  | 2.45   | 4.47   | 5.54   | 4.55   | 5.98   | 5.36   |

---

|    |        |        |        |       |       |       |       |       |
|----|--------|--------|--------|-------|-------|-------|-------|-------|
| Nb | 10.80  | 13.06  | 14.24  | 11.09 | 7.83  | 10.64 | 9.13  | 10.26 |
| Rb | 183.16 | 217.23 | 214.83 | 162.9 | 158.9 | 174.1 | 152.2 | 193.9 |
| Sr | 6.70   | 6.30   | 32.40  | 128.0 | 108.5 | 121.4 | 139.2 | 127.1 |
| Ta | 1.69   | 1.96   | 2.02   | 1.13  | 0.57  | 1.34  | 0.72  | 0.98  |
| Th | 7.29   | 8.38   | 11.65  | 13.38 | 14.99 | 11.48 | 14.52 | 12.31 |
| U  | 3.35   | 3.54   | 4.35   | 4.44  | 3.13  | 3.52  | 2.87  | 2.44  |
| Zr | 35.00  | 40.90  | 44.60  | 135.1 | 168.1 | 127.1 | 176.2 | 158.1 |

---

MJ-22, MJ-23 and MJ-26 are samples of the rhyolites. LWZ-02, LWZ-03, LWZ-04, LWZ-05 and LWZ-13 are samples of the granite porphyries. Differentiation index (DI) = Qz (quartz) + Or (orthoclase) + Ab (albite) + Ne (nepheline) + Lc (leucite) + Kp (kalsilite) [55]. The formula of A/CNK is from Shand [85].
